# Supplementary material
Source: publisher figshare collection journal article supplement (https://tandf.figshare.com/articles/dataset/_/5503720)
Supplement: Supplementary file 2 [file 1]

Archive with 2 entries (2 files):
- matlab_code.zip
- supplemental.pdf
